# Supplementary material for: Hybrid gas-phase synthesis of nanoscale Fe–SiO2 core–shell agglomerates for efficient transfection into cells and use in magnetic cell patterning
Source: Royal Society of Chemistry journal article supplement (doi:10.1039/c3ra42151a), 2013-01-01
Supplement: c3ra42151a.pdf [file c3ra42151a.pdf]

*Supplementary Information for*

**Hybrid gas-phase synthesis of nanoscale Fe-SiO<sub>2</sub> core-shell agglomerates for efficient transfection into cell and use in magnetic cell patterning**

Jeong Hoon Byeon and Young-Woo Kim

## EXPERIMENTAL DETAILS

*Hybrid gas-phase synthesis of nanoscale Fe-SiO<sub>2</sub> core-shell agglomerates:* As shown in Fig. S1, a spark discharge was used to produce Fe nanoparticles in the gas-phase, and the particle-laden flow was employed as the operating gas for atomizing the SiO<sub>2</sub>-PEI (408700, Sigma-Aldrich, US) solution. Spark discharge has been used to produce a variety of metallic, carbonaceous, and other composite materials with nanoscale dimensions at ambient temperatures and pressures. For the preparation of the nanoscale SiO<sub>2</sub> spheres, Solution 1 was a tetraethoxysilane (Merck, US), and Solution 2 was a mixture solution of 4.8 mL ammonia (25%), 63 mL ethanol (EtOH), and 20 mL deionized water. Solutions 1 and 2 were injected drop by drop with the aid of a peristaltic pump (323Du/MC4, Watson-Marlow Bredel Pump, US) at constant rates of 0.4 and 3.1 mL min<sup>-1</sup>, respectively. Solutions 1 and 2 were mixed in a flask and an ultrasonic probe (VCX 750, 13 mm titanium alloy horn, 20 kHz, Sonics & Materials Inc., US) was then immersed into the mixture solution. The probe acted as an ultrasound irradiator (10 W mL<sup>-1</sup> input power density) and the active part of the probe was the planar circular surface, of area 1.3 cm<sup>2</sup>, at the bottom of the probe. The Fe particles passed over the atomizer orifice, where they mixed with atomized SiO<sub>2</sub>-PEI droplets to form hybrid droplets. The droplets then passed through a heated tubular chamber to extract solvent from the droplets to form nanoscale Fe-SiO<sub>2</sub> core-shell agglomerates.

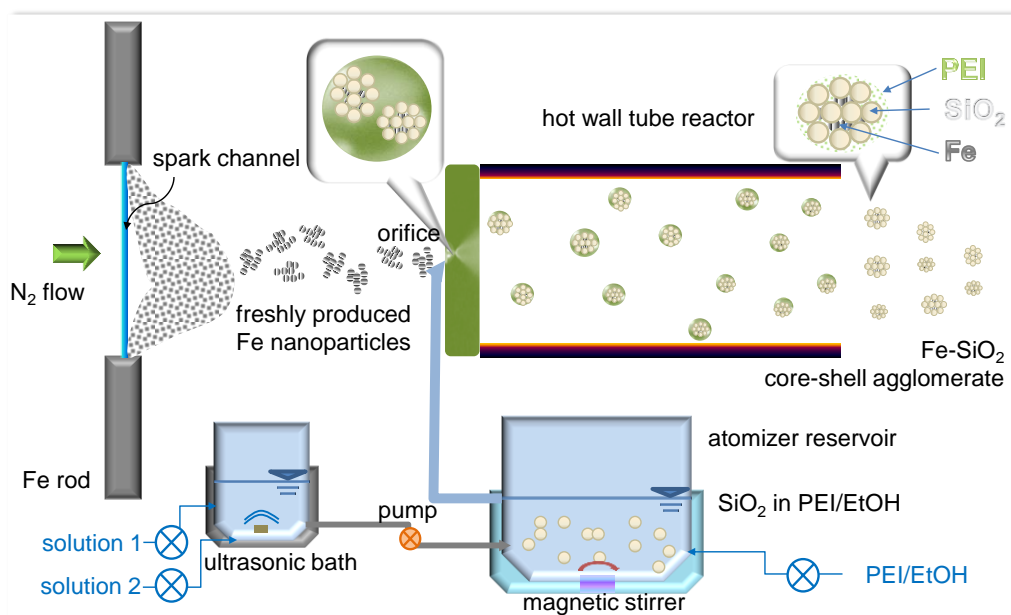

**Fig. S1.** Continuous hybrid gas-phase synthesis of nanoscale Fe-SiO<sub>2</sub> core-shell agglomerates. PEI was added during gas-phase synthesis to form simultaneously cationic layers on the surface of the Fe-SiO<sub>2</sub> agglomerates.

*In vitro cell viability and gene transfection efficiency:*

The cytotoxicity of the samples was evaluated using HeLa cells by the MTT, [3-(4,5-dimethylthiazol-2-yl)-diphenyltetrazolium bromide], assay. The cells were cultured in 200 mL Dulbecco's modified eagle medium (DMEM, Carlsbad, US) supplemented with 10% fetal bovine serum (FBS) at 37°C, 5% carbon dioxide, and 95% relative humidity. The cells were seeded in a 96-well microtiter plate (Nunc, Germany) at densities of  $1 \times 10^5$  cells well<sup>-1</sup>. After 24 h, the culture media were replaced with serum-supplemented culture media containing the sample, and the cells were incubated for 24 h. 30 µL of the MTT reagent was then added to each well. The cells were incubated for an additional 2 h. The absorbance was then measured using a microplate reader (Spectra Plus, TECAN, Switzerland) at a wavelength of 490 nm. The cell viability (%) was compared with that of the untreated control cell in media without sample and calculated using  $[A]_{\text{test}}/[A]_{\text{control}} \times 100\%$ , where  $[A]_{\text{test}}$  is the absorbance of the wells with sample and  $[A]_{\text{control}}$  is the absorbance of the control wells.

HeLa cells were seeded in 24-well plates at a density of  $1 \times 10^6$  cells well<sup>-1</sup> in 1 mL of complete DMEM medium supplement with 10% FBS at 37°C, 5% carbon dioxide, and 95% relative humidity, one night before transfection. The culture medium was replaced with serum free DMEM medium, and transfection complexes were added to the cells. The cells were incubated with the transfection complexes at 37°C for an additional 24 h after the medium was replaced by fresh complete medium. After incubation for 24 h, the medium was aspirated and washed with phosphate-buffered saline. The cells were trypsinized and the transfection results were then measured with a luminometer (TD-20/20, Promega, US). The final luciferase activity was expressed in relative light units (RLU) mg<sup>-1</sup> of protein.

The aerosolized samples were detached from the polytetrafluoroethylene substrate by immersing the substrates in water and subjecting them to ultrasound treatment for 10 s. Measurements of cell viability and transfection efficiency were performed in triplicate at least, with the average values with their deviation reported.

## SUMMARY OF PARTICLE SIZE DISTRIBUTION

**Table S1** A summary of the size distributions of spark produced Fe, collision atomized SiO<sub>2</sub>, and their incorporated structure (Fe-SiO<sub>2</sub>) from hybrid gas-phase route

| Case                | GMD (nm) | GSD (-) | TNC ( $\times 10^6$ particles cm <sup>-3</sup> ) |
|---------------------|----------|---------|--------------------------------------------------|
| Fe                  | 25.7     | 1.46    | 3.18                                             |
| SiO <sub>2</sub>    | 113.5    | 1.77    | 1.88                                             |
| Fe-SiO <sub>2</sub> | 96.7     | 2.09    | 2.12                                             |

## STRUCTURAL CHARACTERIZATION

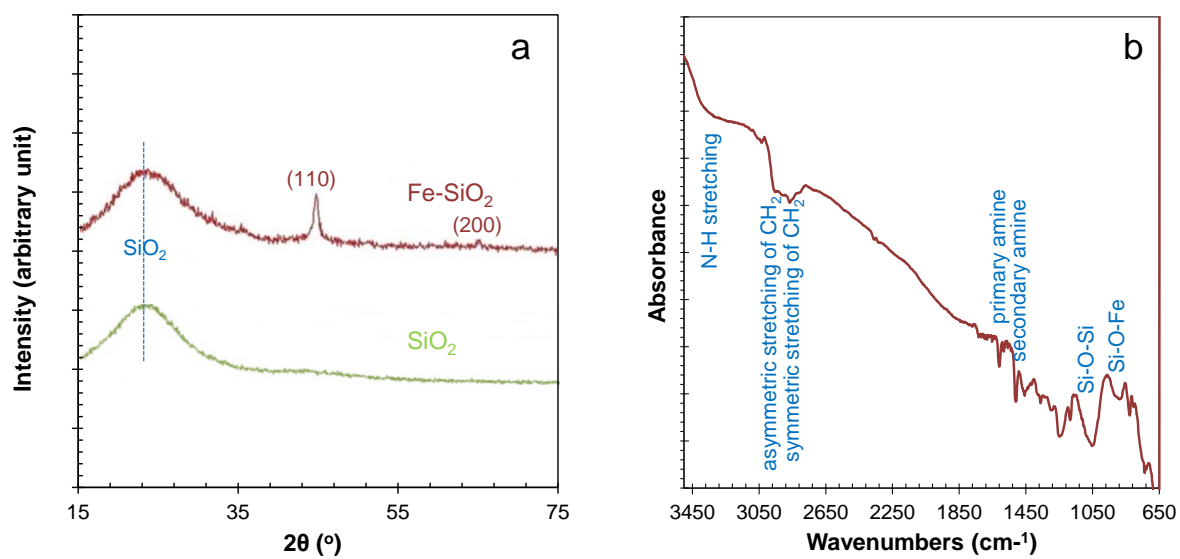

**Figure S2.** (a) XRD patterns of Fe and Fe-SiO<sub>2</sub> samples. (b) FTIR spectrum of the Fe-SiO<sub>2</sub> sample.

## MAGNETIC PROPERTY

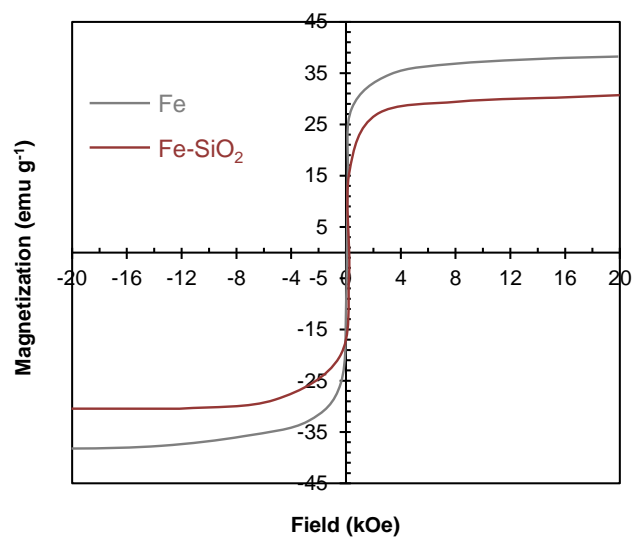

**Figure S3.** Magnetic properties of Fe and Fe-SiO<sub>2</sub> samples.

## gfp EXPRESSION

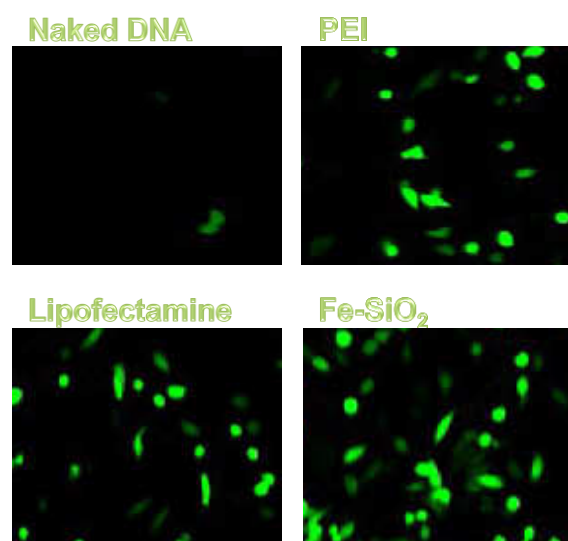

**Figure S4.** Transfection fluorescence imaging of naked DNA, PEI, lipofectamine, and Fe-SiO<sub>2</sub> samples in HeLa cells for 24 h.
